# Supplementary material
Source: Springer Nature journal article supplement (https://www.springermedizin.de/resource/supplementary/12950_2008_77_MOESM6_ESM.pdf/9557910)

## Eosinophils

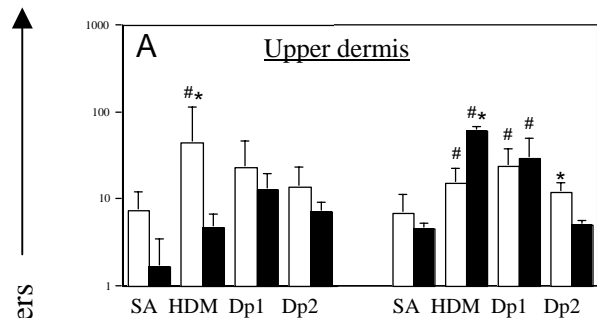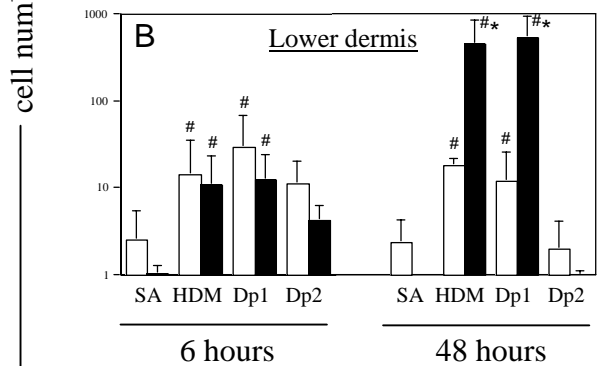

## Mast cells

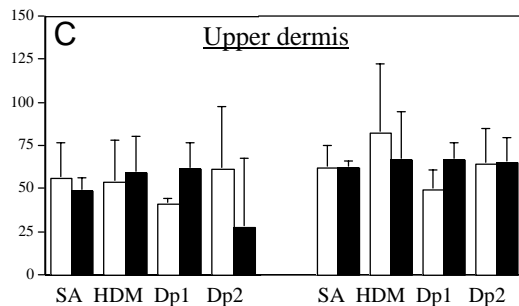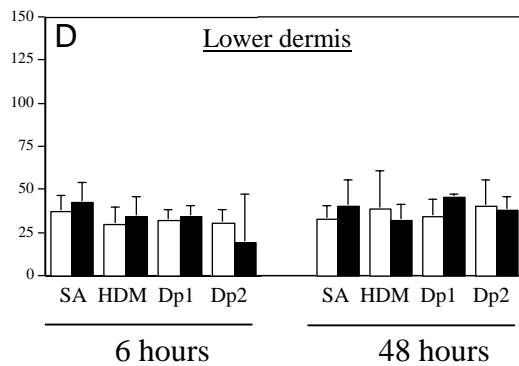

time (h) after allergen challenge

Supplement: MOESM6 [file 9557910]
